# Supplementary material for: Heterostructured Bi2S3@NH2-MIL-125(Ti) nanocomposite as a bifunctional photocatalyst for Cr(vi) reduction and rhodamine B degradation under visible light
Source: Royal Society of Chemistry journal article supplement (doi:10.1039/c8ra00882e), 2018-01-01
Supplement: c8ra00882e1.pdf [file c8ra00882e1.pdf]

## ***Supporting Information***

### **Heterostructured Bi<sub>2</sub>S<sub>3</sub>@NH<sub>2</sub>-MIL-125(Ti) nanocomposite as a bifunctional photocatalyst for Cr(VI) reduction and rhodamine B degradation under visible light**

Minghua Wang<sup>a,b</sup>, Longyu Yang<sup>b</sup>, Jinyun Yuan<sup>b</sup>, Linghao He<sup>a,b</sup>, Yingpan Song<sup>b</sup>,  
Hongzhong Zhang<sup>a</sup>, Zhihong Zhang<sup>a,b\*</sup>, Shaoming Fang<sup>a,b\*</sup>

<sup>a</sup> Henan Collaborative Innovation Center of Environmental Pollution Control and  
Ecological Restoration;

<sup>b</sup> Henan Provincial Key Laboratory of Surface & Interface Science, Zhengzhou  
University of Light Industry, Zhengzhou, 450001, P. R. China.

\*Corresponding authors:

Zhengzhou University of Light Industry, No. 136 Science Avenue, Zhengzhou,  
450001, China.

Tel.: +86-37186609676

E-mail: mainzhzh@163.com or mingfang@zzuli.edu.cn.

## **Contents**

**S1. Synthesis of  $\text{Bi}_2\text{S}_3$  and  $\text{NH}_2\text{-MIL-125(Ti)}$**

**S2. XPS spectra of all samples**

**S3. Surface morphologies of the  $\text{NH}_2\text{-MIL-125(Ti)}$  and  $\text{Bi}_2\text{S}_3$  samples**

**S4.  $\text{N}_2$  adsorption-desorption isotherms of the samples**

**S5. Photocatalytic activity of the samples**

**S6. The reusability and stability of the as-synthesized photocatalyst**

**S7. Mott–Schottky analysis of the as-prepared samples**

## **S1. Synthesis of $\text{Bi}_2\text{S}_3$ and $\text{NH}_2\text{-MIL-125(Ti)}$**

$\text{Bi}_2\text{S}_3$  was synthesized according to the previous report.<sup>1</sup> In typical, 1.82 g  $\text{Bi}(\text{NO}_3)_3 \cdot 5\text{H}_2\text{O}$  was first dissolved into 25 mL ethylene glycol (EG) under nitrogen bubbling and obtained solution A. Meanwhile, 1.35 g  $\text{Na}_2\text{S}$  was dissolved in a mixed solvent of 10 mL EG and 20 mL deionized water under stirring for 15 min, which denoted as solution B. Then solution B was added dropwise to solution A under magnetic stirring, along with plenty of black suspended matter. Subsequently, 1.92 g carbamide and 20 mL deionized water were added to the mixture and stirred for another 30 min. The mixed solution was then transferred into a Teflon-lined stainless steel autoclave and maintained at 180 °C for 24 h. After cooling to room temperature, the precipitate was collected by vacuum filtration, and washed successively by ethanol and water for several times. Finally, the obtained products were dried under vacuum at 60 °C for obtaining the  $\text{Bi}_2\text{S}_3$ .

$\text{NH}_2\text{-MIL-125(Ti)}$  was synthesized using a solvothermal method.<sup>2, 3</sup> The  $\text{H}_2\text{BDC-NH}_2$  (2.2 g), DMF (36 mL), methanol (4.0 mL), and  $\text{Ti}(\text{OC}_4\text{H}_9)_4$  (2.4 mL) were mixed and dispersed with magnetic stirring for 5 mins to form a homogeneous solution. Then, the solution was poured into a Teflon-lined stainless-steel autoclave for 48 h at 150 °C. After cooling to room temperature, the obtained precipitate was separated by centrifugation, following by being washed repeatedly with DMF and methanol and dried at 60 °C overnight. As such, the  $\text{NH}_2\text{-MIL-125(Ti)}$  was obtained.

## S2. XPS spectra of the samples

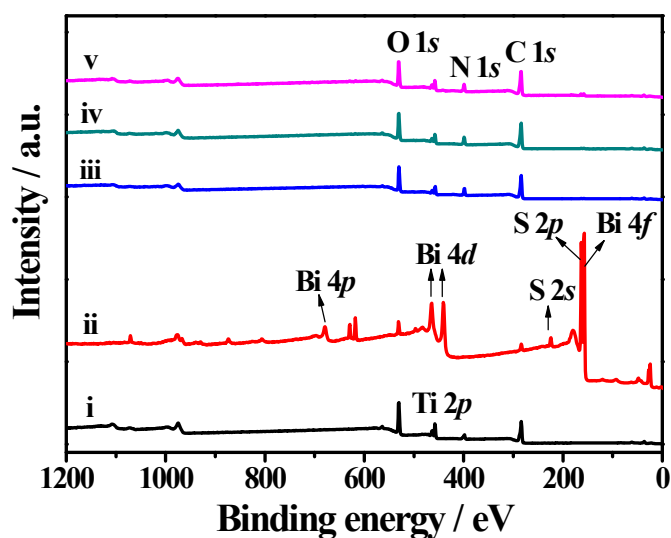

**Fig. S1.** XPS survey spectra of (i) NH<sub>2</sub>-MIL-125(Ti), (ii) Bi<sub>2</sub>S<sub>3</sub>, (iii) Bi<sub>2</sub>S<sub>3</sub>@NM-10, (iv) Bi<sub>2</sub>S<sub>3</sub>@NM-50, and (v) Bi<sub>2</sub>S<sub>3</sub>@NM-100 nanocomposites.

**Table S1.** Atomic percentage of NH<sub>2</sub>-MIL-125(Ti), Bi<sub>2</sub>S<sub>3</sub>, and Bi<sub>2</sub>S<sub>3</sub>@NM nanocomposites.

| Samples                                | Atomic percentage |       |       |       |       |       |
|----------------------------------------|-------------------|-------|-------|-------|-------|-------|
|                                        | C 1s              | N 1s  | O 1s  | Ti 2p | Bi 4f | S 2p  |
| NH <sub>2</sub> -MIL-125(Ti)           | 55.39             | 7.33  | 30.37 | 6.91  | -     | -     |
| Bi <sub>2</sub> S <sub>3</sub>         | 9.75              | -     | -     | -     | 6.1   | 84.15 |
| Bi <sub>2</sub> S <sub>3</sub> @NM-10  | 62.33             | 10.56 | 22.74 | 4.16  | 0.04  | 0.18  |
| Bi <sub>2</sub> S <sub>3</sub> @NM-50  | 61.60             | 10.34 | 22.93 | 4.46  | 0.06  | 0.61  |
| Bi <sub>2</sub> S <sub>3</sub> @NM-100 | 59.89             | 9.98  | 23.11 | 4.86  | 0.19  | 1.98  |

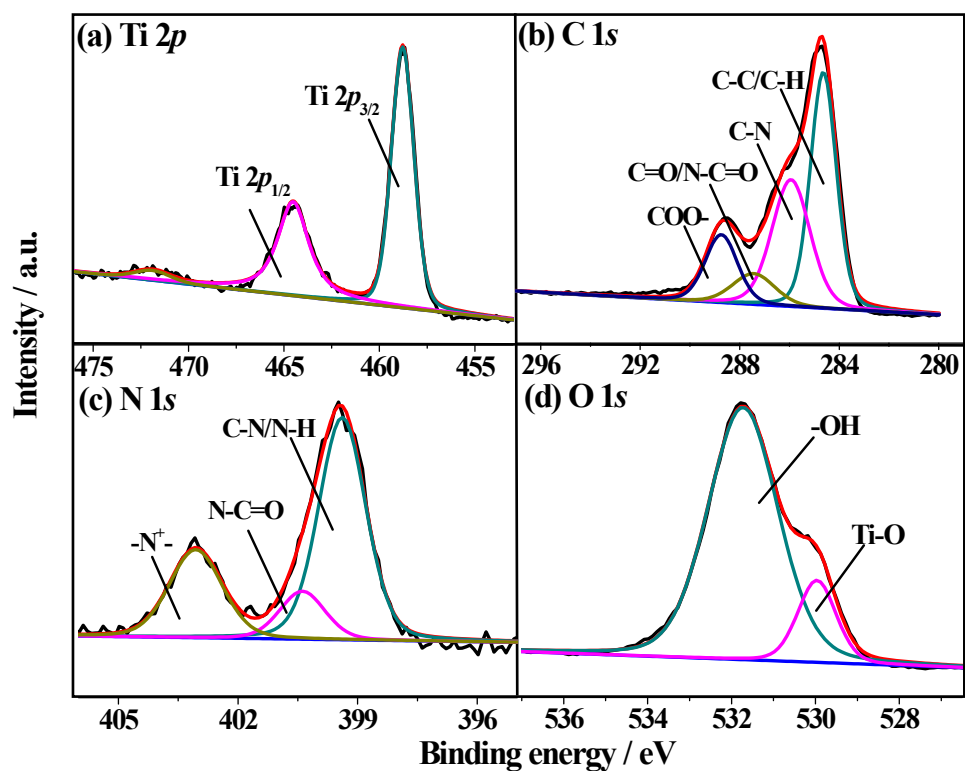

**Fig. S2.** (a) Ti 2p, (b) C 1s, (c) N 1s, and (d) O 1s high resolution XPS spectra of NH<sub>2</sub>-MIL-125(Ti).

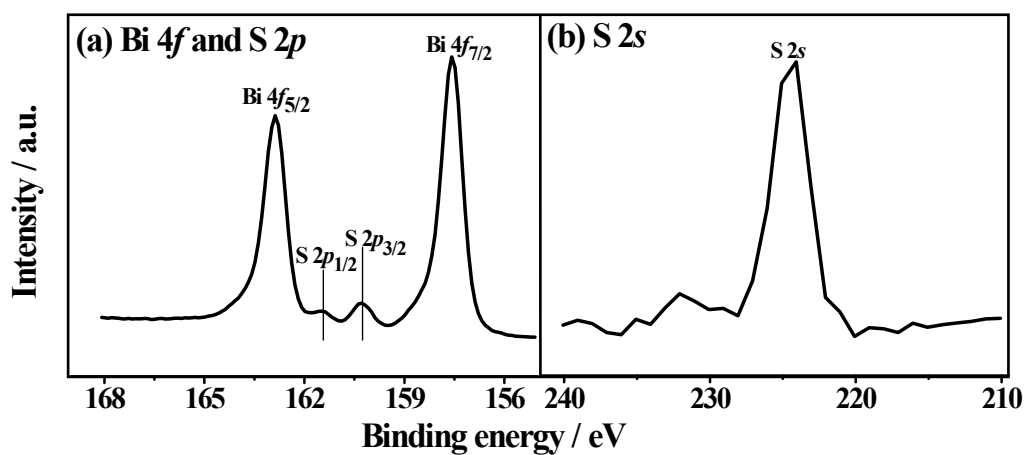

**Fig. S3.** (a) Bi 4f and S 2p, and (b) S 2s high resolution XPS spectra of Bi<sub>2</sub>S<sub>3</sub>.

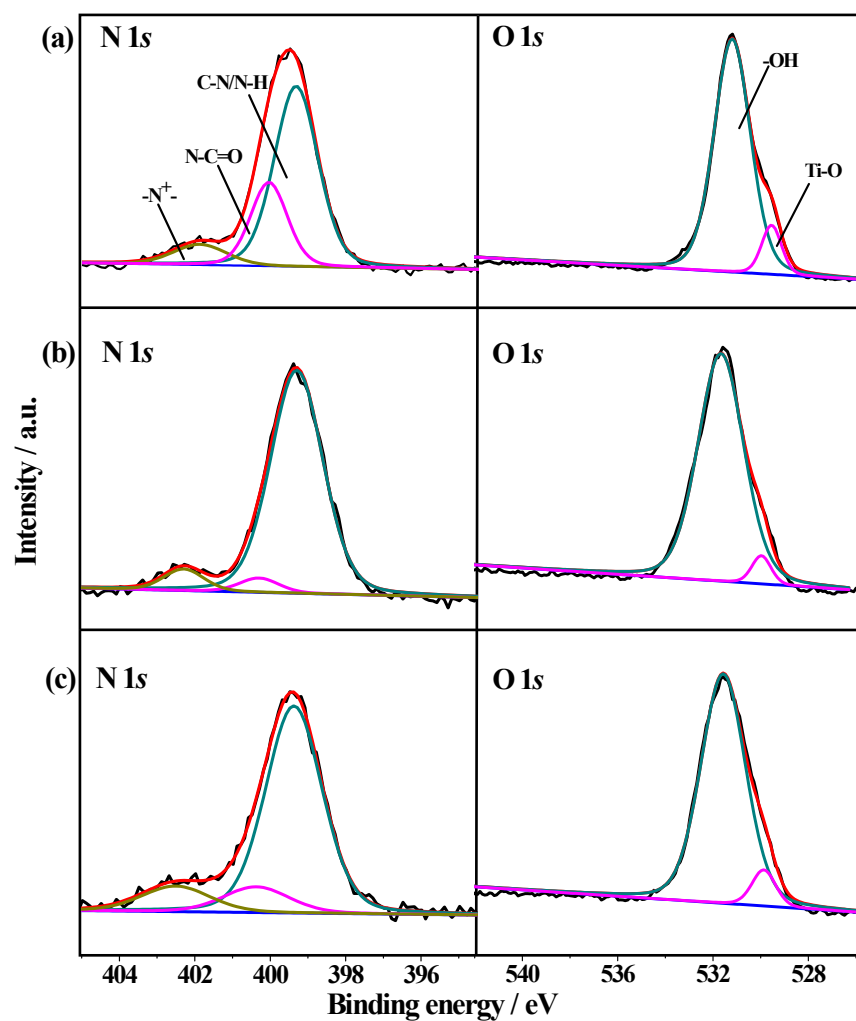

**Fig. S4.** N  $1s$  and O  $1s$  high resolution XPS spectra of (a)  $\text{Bi}_2\text{S}_3@\text{NM}-10$ , (b)  $\text{Bi}_2\text{S}_3@\text{NM}-50$ , and (c)  $\text{Bi}_2\text{S}_3@\text{NM}-100$  nanocomposites.

### S3. Surface morphologies of the $\text{NH}_2\text{-MIL-125(Ti)}$ and $\text{Bi}_2\text{S}_3$ samples

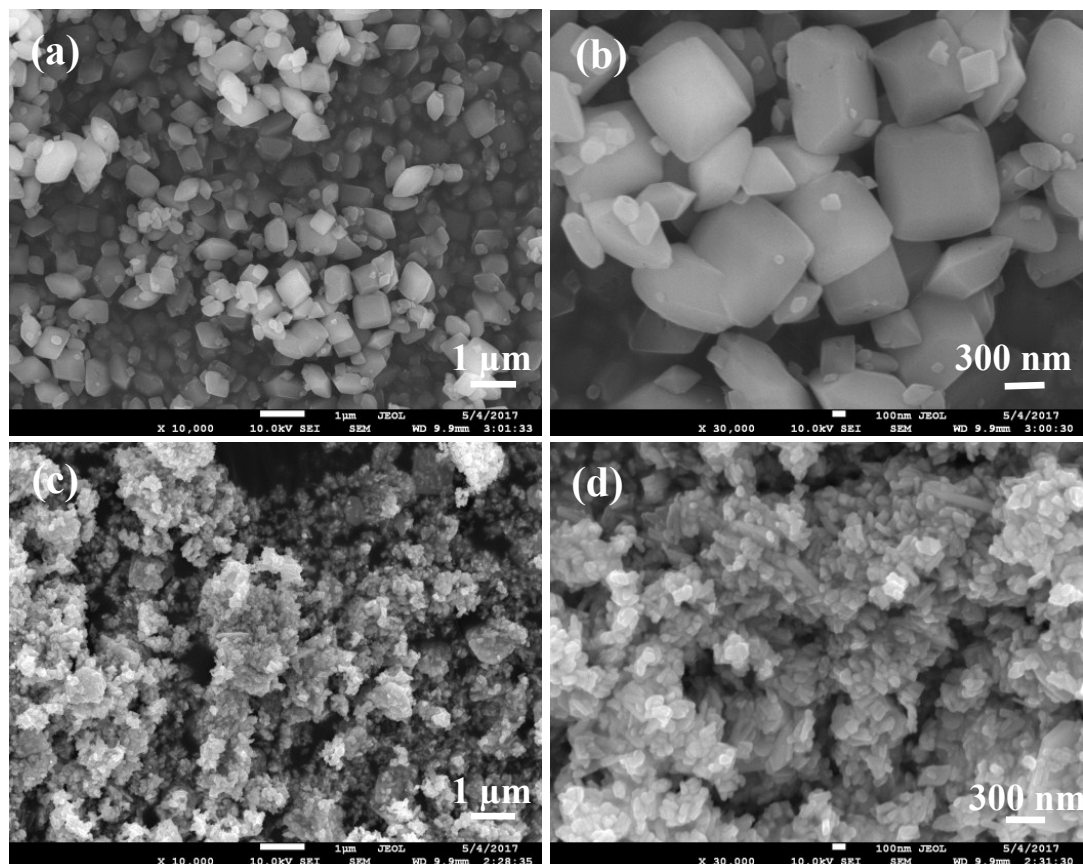

**Fig. S5.** Low- and high-magnification FE-SEM images of (a, b)  $\text{NH}_2\text{-MIL-125(Ti)}$  and (c, d)  $\text{Bi}_2\text{S}_3$ .

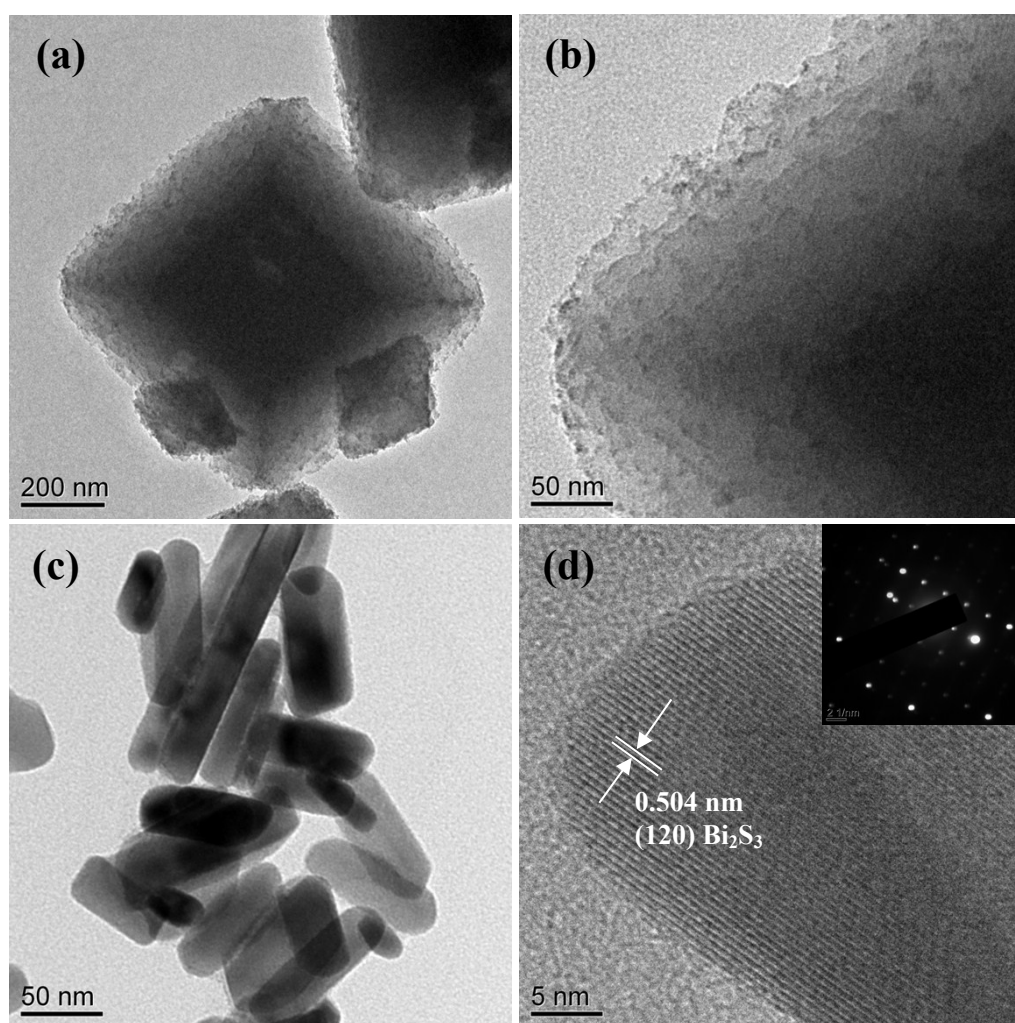

**Fig. S6.** (a, b) TEM images of  $\text{NH}_2\text{-MIL-125(Ti)}$  and (c, d) TEM and HR-TEM images of  $\text{Bi}_2\text{S}_3$  (the inset in (d) is the corresponding SAED pattern).

#### S4. Nitrogen adsorption-desorption isotherms of the samples

To evaluate the pore structures and specific surface areas, N<sub>2</sub> adsorption-desorption measurements of all samples were performed, as shown in **Figure S7**. The NH<sub>2</sub>-MIL-125(Ti) sample illustrated type I isotherms at 77 K with no hysteresis, indicating its typical microporous structure. The Bi<sub>2</sub>S<sub>3</sub> exhibited type IV isotherms with a hysteresis loop in the higher relative pressure ( $P/P_0$ , 0.9–1.0) range, which implies the presence of capillary condensation in the mesoporous and macroporous. N<sub>2</sub> adsorption-desorption isotherms of Bi<sub>2</sub>S<sub>3</sub>@NM samples exhibit hybrid type I/IV isotherms with hysteresis loop at  $P/P_0 = 0.45$ –1.0, confirming the presence of both of micropores and mesopores.<sup>4</sup> It illustrated that the specific surface area of NH<sub>2</sub>-MIL-125(Ti), Bi<sub>2</sub>S<sub>3</sub>@NM-10, Bi<sub>2</sub>S<sub>3</sub>@NM-50, and Bi<sub>2</sub>S<sub>3</sub>@NM-100 were determined to be 622.9, 485.7, 560.9, and 416.7 m<sup>2</sup>·g<sup>-1</sup> using Brunauer–Emmett–Teller (BET) method. The pore size distributions were obtained from the Barrett–Joyner–Halenda (BJH) method and Horvath-Kawazoe (HK) method. An extremely little specific surface area was observed for Bi<sub>2</sub>S<sub>3</sub>, only 12.5 m<sup>2</sup>·g<sup>-1</sup>, with a wide distribution centered around 40–65 nm (**Figure S7b**). The NH<sub>2</sub>-MIL-125(Ti) and Bi<sub>2</sub>S<sub>3</sub>@NM samples (**Figure S7c-d**) revealed narrow distributions centered at 0.5–1 nm and narrow distributions ranged from 3–5 nm, which were associated with the microporous and mesoporous structure.

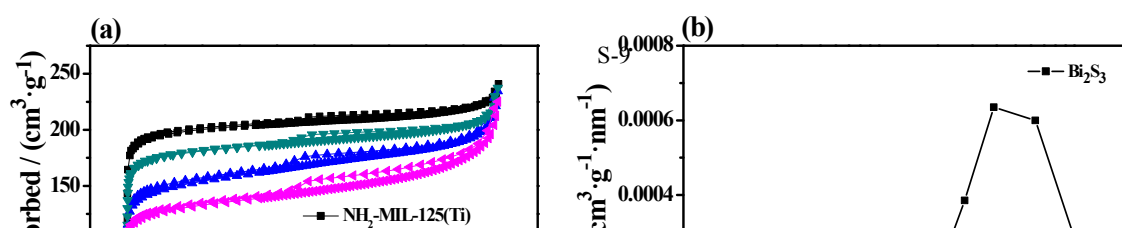

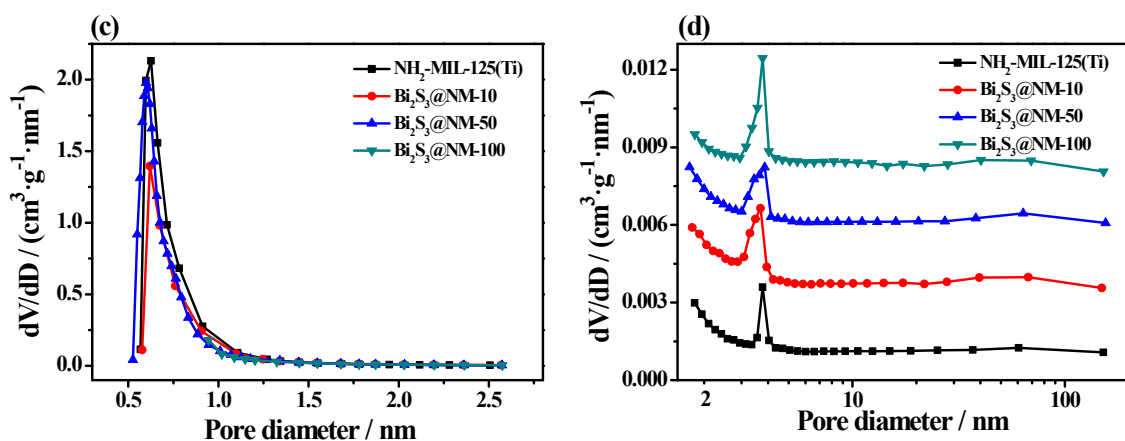

**Fig. S7.** (a) Nitrogen adsorption–desorption isotherms of  $\text{NH}_2\text{-MIL-125(Ti)}$ ,  $\text{Bi}_2\text{S}_3$ , and  $\text{Bi}_2\text{S}_3@\text{NM}$  nanocomposites. (b) Barrett-Joyner-Halenda (BJH) mesopore size distributions of  $\text{Bi}_2\text{S}_3$ . (c) Horvath-Kawazoe (HK) micropore size distributions and (d) Barrett-Joyner-Halenda (BJH) mesopore size distributions of  $\text{NH}_2\text{-MIL-125(Ti)}$  and  $\text{Bi}_2\text{S}_3 @\text{NM}$  nanocomposites.

## S5. Photocatalytic activity of the samples

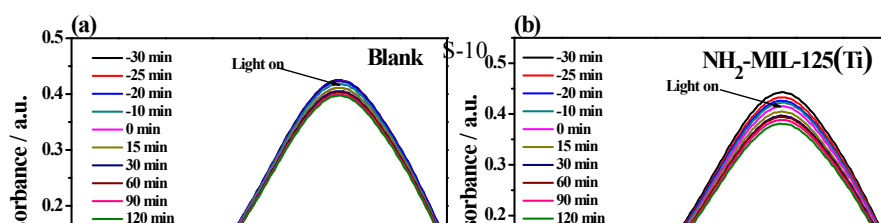

**Fig. S8.** UV-vis absorption spectra for reduction of Cr (VI) with (a) blank, (b)  $\text{NH}_2\text{-MIL-125(Ti)}$ , (c)  $\text{Bi}_2\text{S}_3$ , (d)  $\text{Bi}_2\text{S}_3@\text{NM-10}$ , (e)  $\text{Bi}_2\text{S}_3@\text{NM-50}$ , and (f)  $\text{Bi}_2\text{S}_3@\text{NM-100}$  catalysts. (g) Reaction rate constant ( $k$ ) of various samples (initial concentration of Cr(VI):  $10 \text{ mg}\cdot\text{L}^{-1}$ , photocatalyst dosage:  $100 \text{ mg}\cdot\text{L}^{-1}$ ,  $\text{pH} = 7.0$ ).

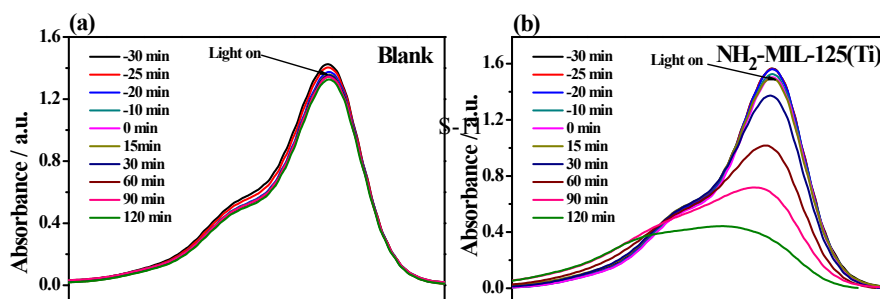

**Fig. S9.** UV-vis absorption spectra for degradation of RhB with (a) blank, (b)  $\text{NH}_2\text{-MIL-125(Ti)}$ , (c)  $\text{Bi}_2\text{S}_3$ , (d)  $\text{Bi}_2\text{S}_3@\text{NM-10}$ , (e)  $\text{Bi}_2\text{S}_3@\text{NM-50}$ , and (f)  $\text{Bi}_2\text{S}_3@\text{NM-100}$  catalysts. (g) reaction rate constant ( $k$ ) of various samples (initial concentration of RhB:  $20 \text{ mg}\cdot\text{L}^{-1}$ , photocatalyst dosage:  $100 \text{ mg}\cdot\text{L}^{-1}$ ,  $\text{pH} = 7.0$ ).

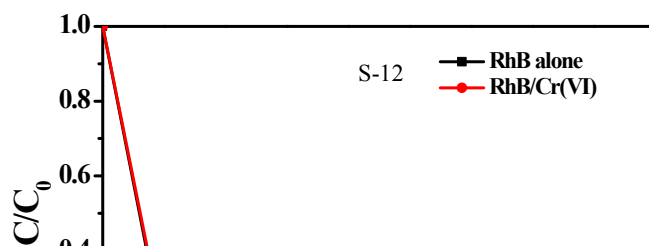

**Fig. S10.** Photocatalytic degradation of RhB with and without of Cr(VI) using the Bi<sub>2</sub>S<sub>3</sub>@NM-100 sample (initial concentration of RhB: 5 mg·L<sup>-1</sup>, Cr(VI): 10 mg·L<sup>-1</sup>, photocatalyst dosage: 200 mg·L<sup>-1</sup>, pH = 3.0).

## **S6. The reusability and stability of the photocatalyst**

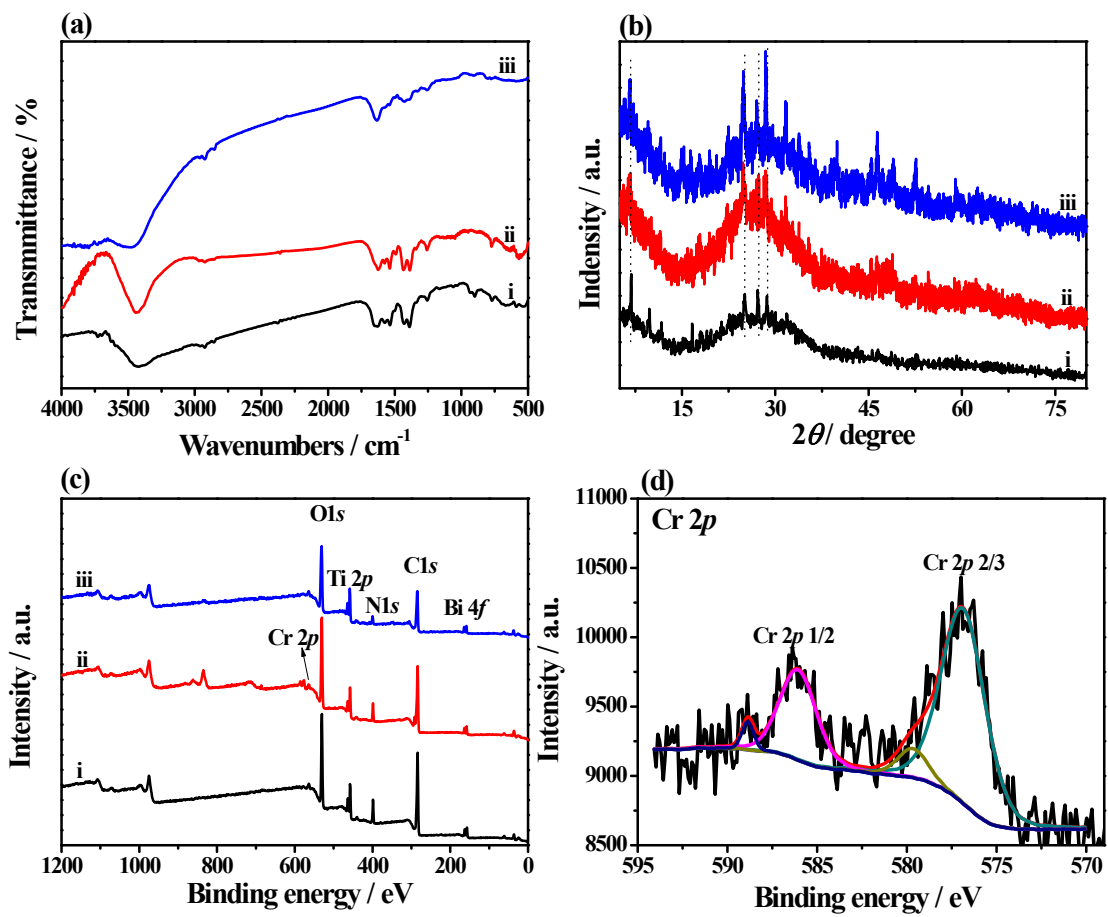

**Fig. S11.** (a) FT-IR spectra, (b) XRD patterns, (c) XPS survey spectra and of the (i) pristine  $\text{Bi}_2\text{S}_3@\text{NM}-100$ , and recycled sample after (ii) Cr(VI) reduction and (iii) RhB degradation. (d) High-resolution XPS spectrum of Cr 2p for the recycled  $\text{Bi}_2\text{S}_3@\text{NM}-100$  after photocatalytic reduction of Cr(VI).

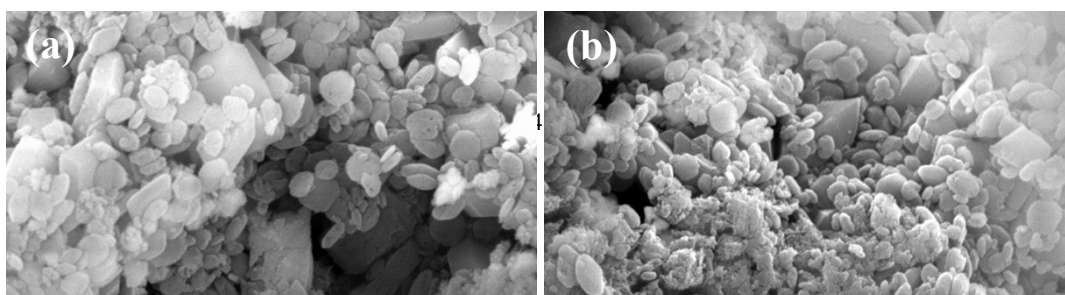

**Fig. S12.** FE-SEM images of the recycled  $\text{Bi}_2\text{S}_3@\text{NM-100}$  after (a) Cr(VI) reduction and (b) RhB degradation.

## S7. Mott–Schottky analysis

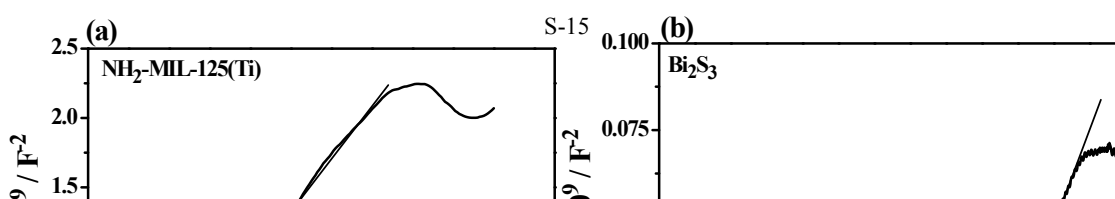

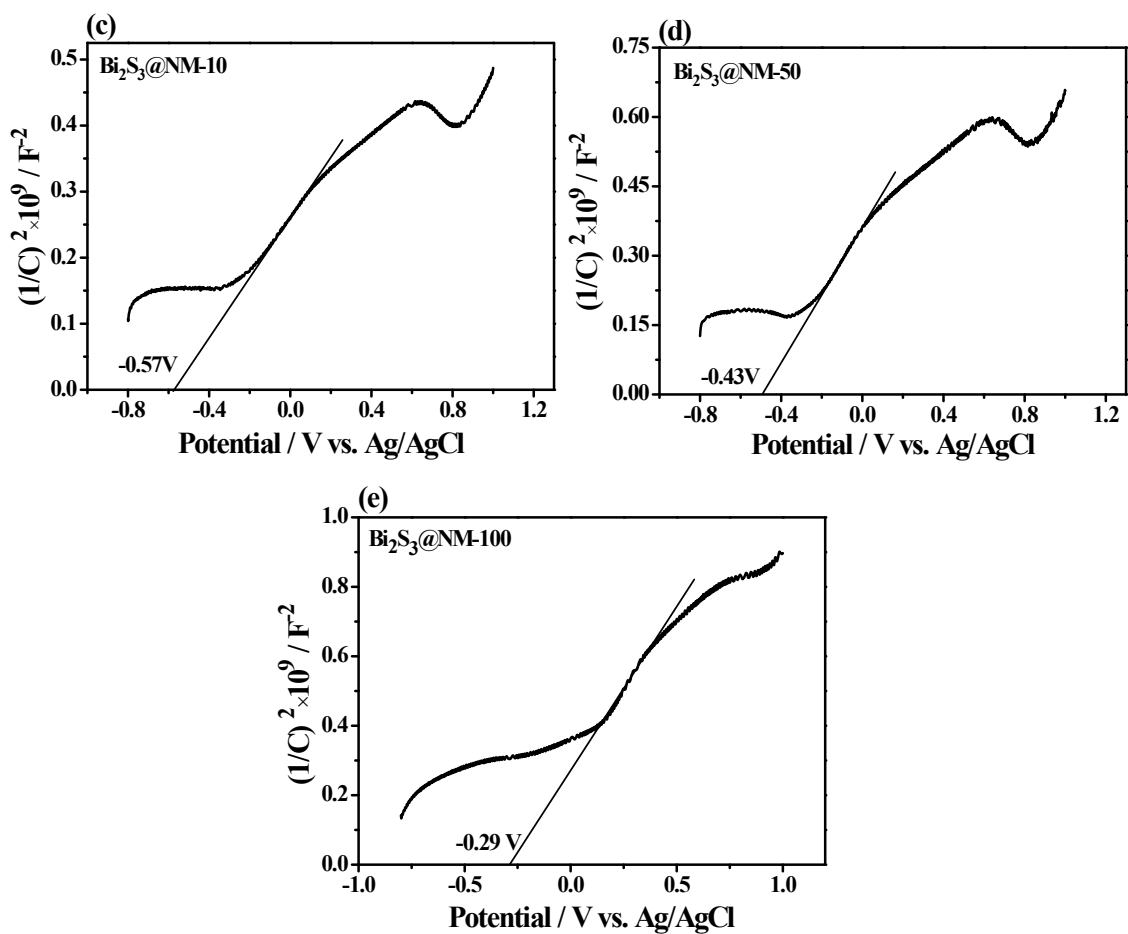

**Fig. S13.** Mott-Schottky plots of (a)  $NH_2$ -MIL-125(Ti), (b)  $Bi_2S_3$ , (c)  $Bi_2S_3@NM-10$ , (d)  $Bi_2S_3@NM-50$ , and (e)  $Bi_2S_3@NM-100$  nanocomposites measured in 0.5 M  $Na_2SO_4$  aqueous solution at a frequency of 100 Hz in the dark.

**Table S2.** The values of flat-band, conduction band, valence band, and  $E_g$  for various

samples.

| Samples                                | Flat band<br>(V vs.<br>Ag/AgCl) | Flat band<br>(V vs.<br>NHE) | Conduction             | Valence<br>band (V vs.<br>NHE) | $E_g$<br>(eV) |
|----------------------------------------|---------------------------------|-----------------------------|------------------------|--------------------------------|---------------|
|                                        |                                 |                             | band<br>(V vs.<br>NHE) |                                |               |
| NH <sub>2</sub> -MIL-<br>125(Ti)       | -0.70                           | -0.49                       | -0.59                  | 2.09                           | 2.68          |
| Bi <sub>2</sub> S <sub>3</sub>         | -0.07                           | 0.14                        | 0.04                   | 1.36                           | 1.32          |
| Bi <sub>2</sub> S <sub>3</sub> @NM-10  | -0.57                           | -0.36                       | -0.46                  | 2.20                           | 2.66          |
| Bi <sub>2</sub> S <sub>3</sub> @NM-50  | -0.43                           | -0.22                       | -0.32                  | 2.32                           | 2.64          |
| Bi <sub>2</sub> S <sub>3</sub> @NM-100 | -0.29                           | -0.08                       | -0.18                  | 2.41                           | 2.59          |

## References:

- 1 Z. Ge, B. Zhang, Z. Yu and B. Jiang, *Crystengcomm*, 2012, **14**, 2283-2288.
- 2 M. Dan-Hardi, C. Serre, T. Frot, L. Rozes, G. Maurin, C. Sanchez and G. Férey, *J. Am. Chem. Soc.*, 2009, **131**, 10857-10859.
- 3 Y. Fu, D. Sun, Y. Chen, R. Huang, Z. Ding, X. Fu and Z. Li, *Angew. Chem.*, 2012, **124**, 3420-3423.
- 4 Z. H. Rada, H. R. Abid, J. Shang, Y. He, P. Webley, S. Liu, H. Sun and S. Wang, *Fuel*, 2015, **160**, 318-327.
